# Supplementary material for: Multi-omics insights reveal the remodeling of gut mycobiome with P. gingivalis
Source: Front Cell Infect Microbiol. 2022 Aug 29;12:937725. doi: 10.3389/fcimb.2022.937725 (PMC9465408; doi:10.3389/fcimb.2022.937725)
Supplement: Supplementary Table 1 — Composition of gut fungi at species level both in P. gingivalis and control groups. [file Table_1.xls]

Species	Ctrl_1	Ctrl_2	Ctrl_3	Ctrl_4	Ctrl_5	Ctrl_6	Ctrl_7	Ctrl_8	Pg_1	Pg_2	Pg_3	Pg_4	Pg_5	Pg_6	Pg_7	Pg_8
s__Piromyces_finnis	0.0742320278838	0.348965230559	0.334357848434	0.401411754997	0.0570507181076	0.527787257568	0.0	0.201718109639	0.166610833158	0.222731507574	0.315601416857	0.0926000387474	0.407015295632	0.258786887632	0.25068036273	0.227634636854
s__Anaeromyces_robustus	0.0622582860954	0.352749071258	0.316367549617	0.135185675334	0.0804784752074	0.0289697512365	0.0638869030937	0.257591500267	0.0790582950509	0.0954789592489	0.0606237332657	0.14403176399	0.218984021918	0.117201999716	0.336423884331	0.207255626194
s__Neocallimastix_californiae	0.0705471103445	0.0437236894794	0.146982356179	0.0804360551782	0.0533575336934	0.00320541334367	0.0634678480352	0.114905760417	0.20024552475	0.118120078058	0.110509602094	0.183359661206	0.198647244402	0.130370410673	0.192589309207	0.188429016202
s__Piromyces_sp._E2	0.488536472309	0.0233037174283	0.0262767216873	0.0505218814759	0.0852593570567	0.0338036434885	0.0755215879378	0.124886597431	0.0906038778941	0.0291248349183	0.0977656729875	0.0914988980835	0.0280017350218	0.0684208307482	0.045226019694	0.0722412354401
s__Puccinia_coronata	0.00156351998465	0.0	0.0	0.0873019317629	0.0436620476562	0.168885824922	0.0963728637857	0.00181430148978	0.0258569927483	0.0	0.0027786559345	0.0	0.00996626697808	0.00326956866978	0.0	0.00224349006964
s__Rhizoclosmatium_globosum	0.00376036452006	0.0145542987885	0.00839170654412	0.00683941559107	0.123235878807	0.0089134815654	0.206731165035	0.0130935918486	0.0472544725066	0.0588856120359	0.0454996116059	0.0312064469729	0.0101996542428	0.0554502291616	0.0	0.0249282985207
s__Pyricularia_pennisetigena	0.00300069492004	0.0069684218442	0.00558034357731	0.00654925856599	0.0106891023559	0.0117360840611	0.00399114419301	0.0176317117507	0.0950244483497	0.130124848975	0.0213956506956	0.0545930966273	0.0183130155722	0.0480626594458	0.0273919789647	0.0376906331701
s__Saccharomyces_cerevisiae	0.00201266122686	0.0280436488852	0.0	0.0417315561065	0.097505470271	0.0515242714879	0.0963715305142	0.0157681975006	0.0	0.00727323850976	0.00958014210254	0.0385445483247	0.00467928388606	0.006140409453	0.0	0.00773501800131
s__Piloderma_croceum	0.0614770031935	0.0	0.0076383426271	0.0143700487153	0.0442725941551	0.0	0.0605748125748	0.00653026361137	0.00794277303835	0.0	0.0662147797158	0.0	0.00887510210947	0.0236985757483	0.0	0.0157044304875
s__Oidiodendron_maius	0.0128363060469	0.0170339200636	0.0368302676103	0.036020922113	0.00718545213926	0.021516154112	0.0	0.0173596174336	0.00760446974227	0.0	0.0374423887174	0.0	0.0181192270477	0.0118885149687	0.00223193902675	0.012476297554
s__Ceratobasidium_theobromae	0.0	0.00958158003578	0.0	0.0	0.0235160251831	0.0146701050764	0.0054878232654	0.0215498699176	0.0311091944002	0.014910138945	0.0160467380218	0.0474097944395	0.0191850639328	0.0440574378252	0.0150655884306	0.0475059022247
s__Smittium_culicis	0.0078189230574	0.00185449936177	0.00029701828718	0.00622275593954	0.0779630122767	0.00990594012754	0.124913267744	0.0151663513887	0.0107803225759	0.00360729168023	0.0216729038499	0.0240350053556	0.00499605963859	0.00628977622673	0.000971973447134	0.00491655976566
s__Phialocephala_subalpina	0.0194821237347	0.0702042499231	0.0394788485917	0.00293250383552	0.0268025253103	0.0	0.0	0.0570179733231	0.00101305382036	0.0	0.0	0.0	0.00078093883037	0.0051239509004	0.0196241043329	0.000703183454665
s__Alternaria_alternata	0.0	0.0	0.0	0.0141566942802	0.00462105298355	0.0207559565273	0.0	0.0	0.0533335784706	0.0280706144986	0.0490816262568	0.0536274723989	0.0021229374024	0.0756728789773	0.0	0.00254875183321
s__Psilocybe_cyanescens	0.0100285401915	0.0	0.00960789589837	0.00422854303065	0.0588923065453	0.00183695228782	0.0412302547939	0.0125495058095	0.0211953378885	0.0652049279995	0.0158085811384	0.00356464619845	0.00108186450749	0.0	0.0031441228029	0.00974147003924
s__Penicillium_roqueforti	0.0111512311218	0.0155376973553	0.00663608425411	0.0133861534879	0.00635568248188	0.00634382922222	0.0	0.0174728675007	0.0100894684541	0.00402976728244	0.00578260829613	0.0170846106088	0.00259257620713	0.010206356253	0.0190016430656	0.0070033271093
s__Corynespora_cassiicola	0.00691500924311	0.0	0.0	0.00500496093687	0.0236473996254	0.00196694146276	0.0331108889755	0.0108351301262	0.00417106517097	0.0628768839999	0.00943925765985	0.0105943674725	0.00160768692175	0.016877550005	0.0	0.0028952302016
s__Cyberlindnera_jadinii	0.022607975425	0.0	0.0	0.00123359322304	0.0289923598147	0.0	0.0240562115744	0.002952036975	0.00340922678358	0.0285947870177	0.0058618221084	0.00432966159265	0.0	0.0	0.0	0.00473284206473
s__Valsa_malicola	0.0128046895295	0.0	0.0127000922794	0.00465787785943	0.0243269226031	0.0182111649224	0.0113541171008	0.0111464844401	0.0	0.0	0.0	0.0	0.0	0.0	0.0	0.0
s__Rhizophagus_irregularis	0.0092176030702	0.0	0.0031300510717	0.00237596154421	0.00899338073571	0.00309647646681	0.0	0.00185774740668	0.0108459500426	0.0	0.00272749088189	0.00402916100053	0.0220216195454	0.0	0.00760408248862	0.0130787686079
s__Smittium_megazygosporum	0.00672710138326	0.0	0.00400328995764	0.0102777087551	0.00766826908141	0.0114809517989	0.00715803034616	0.00702713149485	0.0243463260523	0.0145860054897	0.0	0.0103064770521	0.00156399977713	0.0	0.0	0.0
s__Amphiamblys_sp._WSBS2006	0.0	0.0	0.0	0.0	0.0	0.0	0.0	0.00448955623282	0.0155545972001	0.0186376736813	0.0	0.0197540810165	0.00199844415967	0.0157347992234	0.00418488567516	0.0323903878805
s__Hypoxylon_sp._CI-4A	0.0	0.0	0.00324972949502	0.00238373749277	0.011693051196	0.00310661048677	0.0436600303988	0.00570437733111	0.00309373203979	0.00741388124338	0.0	0.0117869654684	0.0	0.0133283005186	0.0	0.00457276064195
s__Hesseltinella_vesiculosa	0.0	0.0	0.0	0.0236735441722	0.00363649873963	0.0217783003196	0.0	0.0	0.00769712026397	0.0	0.0	0.0	0.0	0.00389314619959	0.0	0.0
s__[Candida]_glabrata	0.00353653329863	0.0	0.00526146680147	0.00128646150403	0.006718864338	0.0	0.0	0.0	0.0284426920231	0.00852007939715	0.0061130430559	0.0180608740722	0.0	0.00719305107351	0.00860890767462	0.00246783907661
s__Puccinia_striiformis	0.0	0.0	0.00283309750848	0.00415626024381	0.00542677504223	0.0	0.0	0.00994609380806	0.0	0.0	0.0	0.0	0.00221366122302	0.0	0.0440032801003	0.0
s__Fusarium_sp._AF-4	0.0158015317598	0.00564544813893	0.0036167202236	0.00265293207051	0.0	0.0	0.00646682937984	0.0031742852579	0.00366589524846	0.00439251229148	0.00315156884225	0.0	0.00282595049747	0.0	0.0	0.00763374116988
s__Lodderomyces_elongisporus	0.0148699620343	0.00383689523124	0.0	0.00450762373493	0.00470843663286	0.00469965546385	0.0175805684142	0.0	0.0	0.00895603451646	0.0	0.0	0.0	0.00504073656986	0.0020109795458	0.0
s__Botrytis_cinerea	0.0	0.0	0.0	0.0	0.0	0.0	0.0	0.0	0.0205115567473	0.00245771521072	0.0352675560918	0.0156296025625	0.00158118658787	0.0165993486311	0.0	0.0
s__Aspergillus_novofumigatus	0.0109538641993	0.00436076967496	0.00186246612442	0.00102461535719	0.0	0.0	0.0	0.000817314914698	0.000943894646782	0.0	0.00811465892377	0.0	0.00400194127549	0.00668380851964	0.00533295165683	0.0111380347705
s__Phellinidium_pouzarii	0.0	0.0	0.0	0.0	0.0274106404729	0.0	0.00516501013212	0.0	0.0	0.00350826798707	0.0100685415038	0.0111552457505	0.0	0.0258367388273	0.0	0.0
s__Debaryomyces_fabryi	0.00863572084551	0.0160435758739	0.0025695535542	0.0	0.0	0.0	0.0	0.00451043788972	0.0	0.0	0.00447815944793	0.0198459604631	0.0	0.0	0.0	0.0
s__Rhizophagus_clarus	0.00692647454345	0.0	0.0	0.0	0.0	0.0	0.0	0.00401966485508	0.00232110051483	0.0	0.00199544928769	0.00294775923975	0.0	0.00747792438336	0.0	0.0153934516659
s__Kwoniella_heveanensis	0.0	0.0	0.0	0.0	0.0	0.0	0.0	0.0	0.0	0.0359440849566	0.0	0.00634952604101	0.0	0.00505761403606	0.0	0.0104111961045
s__Podospora_anserina	0.000881640590846	0.00358296211459	0.000819786339449	0.00288637749533	0.00847958765316	0.00250778469328	0.0128991127057	0.00259020546567	0.00132949220763	0.00238951625769	0.0011429639784	0.00464319102687	0.000512436787047	0.00302601273088	0.00107307945492	0.000922830460462
s__Smittium_angustum	0.0	0.0	0.0	0.0	0.0113787218628	0.0	0.0	0.0208547128234	0.0	0.0	0.00517636710379	0.0	0.0	0.0	0.0	0.0
s__Emmonsia_crescens	0.00172313687404	0.0	0.0	0.00752177027881	0.0	0.0	0.0	0.0	0.0	0.0	0.00893553857359	0.00659997138368	0.00200308092106	0.0	0.0	0.0072145643539
s__Acidomyces_sp._'richmondensis'	0.0	0.0	0.0	0.0	0.0	0.0	0.0	0.0	0.0180998949237	0.0108437374145	0.0	0.022986567001	0.0	0.0	0.0	0.00314088609751
s__Saitozyma_podzolica	0.0	0.0	0.0	0.0108424180273	0.0	0.0141304022141	0.0	0.0	0.0	0.0	0.0	0.0	0.0	0.0	0.0	0.0
s__Diversispora_epigaea	0.00610415336475	0.0	0.0	0.00222046780148	0.0	0.0	0.0	0.0	0.0	0.00735294523315	0.0	0.0233801726002	0.0	0.0	0.0	0.0
s__Candida_viswanathii	0.00457028918592	0.0106134425012	0.00679943402036	0.0	0.0	0.0	0.0	0.0	0.0	0.0	0.0	0.0	0.00265639346762	0.0	0.0	0.00478381113312
s__Lobosporangium_transversale	0.012872981207	0.0	0.0	0.0	0.0	0.0	0.0	0.0025859843901	0.0	0.0	0.0	0.0	0.0	0.0	0.0	0.0
s__Fusarium_verticillioides	0.0	0.0	0.010522933603	0.0	0.013437728676	0.0	0.0	0.0	0.00711067300575	0.0	0.0	0.0	0.0	0.0	0.0	0.0
s__Leucosporidium_creatinivorum	0.00265714487553	0.0123412122107	0.00197657965708	0.00144985822458	0.0	0.00188953052863	0.0	0.0	0.0	0.0	0.00344473803687	0.00508870781104	0.0	0.0	0.0	0.0
s__Penicilliopsis_zonata	0.0	0.0110556692721	0.0	0.0	0.0	0.0	0.0	0.0124326172601	0.0	0.0	0.0	0.0	0.0	0.0	0.0	0.0
s__Pezoloma_ericae	0.0	0.0	0.0	0.00607094192915	0.0	0.00395598339139	0.0	0.0	0.0	0.0	0.00721201708843	0.0	0.0	0.0	0.0	0.0
s__Helotiales_sp._DMI_Dod_QoI	0.0109216469516	0.0	0.0	0.0	0.0	0.0	0.0	0.0	0.0	0.0	0.0	0.0	0.0	0.0	0.0	0.0
s__Drechslerella_stenobrocha	0.0	0.0	0.00220981605662	0.0	0.0	0.0	0.0	0.0	0.0	0.0	0.0	0.00568917533274	0.00345331150791	0.0	0.0	0.00621895447306
s__Torrubiella_hemipterigena	0.0	0.0	0.0	0.0	0.00665547882537	0.00332153322484	0.0	0.0	0.0	0.0	0.0	0.00894524423388	0.0	0.00712519210113	0.0	0.0
s__Aspergillus_lentulus	0.0	0.0	0.0	0.0	0.0	0.0	0.0	0.0	0.000734140280831	0.0	0.0	0.0	0.0	0.00148529078214	0.0148309073709	0.00152874987046
s__Helicocarpus_griseus	0.00426822984317	0.0	0.0	0.0	0.0	0.0	0.0	0.0	0.0	0.0	0.0110667158771	0.0	0.0	0.0	0.0	0.0
s__Rhizopus_microsporus	0.00419588696448	0.0	0.0	0.0	0.00597865047026	0.0	0.0	0.0	0.0	0.0	0.0	0.0	0.0	0.0	0.0	0.0
s__Ophiocordyceps_sinensis	0.0	0.0	0.0	0.0	0.0	0.0	0.0	0.0	0.0	0.005964055578	0.0	0.00632130592528	0.0	0.0	0.0	0.0
others	0.00410316018073	0.0	0.0	0.00447773893669	0.0	0.0	0.0	0.0	0.0	0.0	0.0	0.0	0.0	0.0	0.0	0.00271807450745
